# Supplementary material for: Effect of Age on the Association Between Waist-to-Height Ratio and Incidence of Cardiovascular Disease: The Suita Study
Source: PubMed Central journal article supplement (PMC3775529; doi:10.2188/jea.je20130004), 2013-09-05
Supplement: je-23-351-s001.pdf [file je-23-351-s001.pdf]

**eTable 1. Baseline characteristics and CVD incidence among men and women aged 30-49 years according to quartile of waist-to-height ratio: the Suita Study, Japan**

|                                            | Q1 (low)    | Q2          | Q3          | Q4 (high)   | P     |
|--------------------------------------------|-------------|-------------|-------------|-------------|-------|
| Men aged 30-49 years                       |             |             |             |             |       |
| No. of subjects                            | 222         | 225         | 222         | 224         |       |
| Baseline character                         |             |             |             |             |       |
| Waist-to-height ratio                      | 0.374-0.452 | 0.453-0.481 | 0.482-0.514 | 0.515-0.650 |       |
| Waist, cm                                  | 73.0±3.70   | 79.3±2.71   | 84.0±3.3    | 90.3±5.4    | <0.01 |
| Height, cm                                 | 170.2±5.2   | 169.2±5.3   | 168.7±5.7   | 166.7±5.5   | <0.01 |
| Age, years                                 | 39.0±5.5    | 39.4±5.4    | 40.6±5.2    | 41.6±5.3    | <0.01 |
| Body mass index, kg/m <sup>2</sup>         | 20.1±1.6    | 22.0±1.4    | 23.8±1.6    | 26.2±2.4    | <0.01 |
| Hypertension, %                            | 6           | 15          | 17          | 29          | <0.01 |
| Diabetes, %                                | 3           | 1           | 1           | 5           | 0.11  |
| Hypercholesterolemia, %                    | 11          | 20          | 28          | 34          | <0.01 |
| Smoking status<br>(current/quit/never), %  | 71/13/16    | 56/18/26    | 59/22/20    | 56/20/24    | 0.01  |
| Drinking status<br>(current/quit/never), % | 76/1/23     | 84/1/15     | 85/1/14     | 80/2/18     | 0.24  |
| Incidence of any CVD, n,                   | 5           | 4           | 2           | 6           |       |
| Women aged 30-49 years                     |             |             |             |             |       |
| No. of subjects                            | 282         | 281         | 283         | 279         |       |
| Baseline character                         |             |             |             |             |       |
| Waist-to-height ratio                      | 0.352-0.431 | 0.432-0.467 | 0.468-0.506 | 0.507-0.778 |       |
| Waist, cm                                  | 64.1±3.3    | 70.0±2.9    | 75.3±2.9    | 85.1±6.7    | <0.01 |
| Height, cm                                 | 157.4±5.1   | 155.9±4.9   | 155.0±4.8   | 154.5±5.2   | <0.01 |
| Age, years                                 | 38.6±4.9    | 40.1±5.3    | 41.1±5.3    | 42.5±4.9    | <0.01 |
| Body mass index, kg/m <sup>2</sup>         | 19.3±1.6    | 20.8±2.0    | 21.8±2.1    | 24.6±3.2    | <0.01 |
| Hypertension, %                            | 2           | 6           | 7           | 17          | <0.01 |
| Diabetes, %                                | 1           | 0           | 1           | 4           | <0.01 |
| Hypercholesterolemia, %                    | 13          | 21          | 17          | 23          | 0.01  |
| Smoking status<br>(current/quit/never), %  | 16/2/82     | 13/6/82     | 17/1/82     | 16/6/78     | <0.01 |
| Drinking status<br>(current/quit/never), % | 44/1/55     | 43/3/54     | 45/1/54     | 40/0/60     | 0.13  |
| Postmenopausal, %                          | 4           | 7           | 8           | 13          | <0.01 |
| Incidence of any CVD, n,                   | 3           | 1           | 2           | 5           |       |

Continuous data with a normal distribution were analyzed with analysis of variance: mean ± SD.

Dichotomous and categorical data were analyzed with the  $\chi^2$  test.

Q, quartile; hypertension was defined as systolic blood pressure/diastolic blood pressure  $\geq$  140/90 mm Hg or current use of antihypertensive medications; diabetes was defined as a fasting plasma glucose level  $\geq$  7.0 mmol/L, a non-fasting plasma glucose level  $\geq$  11.1 mmol/L, or current use of antidiabetic medications; hypercholesterolemia was defined as a total serum cholesterol level  $\geq$  5.7 mmol/L or current use of antihyperlipidemic medications.
