# Supplementary material for: Effect of Age on the Association Between Waist-to-Height Ratio and Incidence of Cardiovascular Disease: The Suita Study
Source: PubMed Central journal article supplement (PMC3775529; doi:10.2188/jea.je20130004), 2013-09-05
Supplement: je-23-351-s002.pdf [file je-23-351-s002.pdf]

**eTable 2. Multivariable-adjusted hazard ratios for cardiovascular disease in the upper and lower fourth quartile of WHtR according to sex and age group: the Suita Study, Japan**

|                 | Q1 | Lower Q4         | Upper Q4         |
|-----------------|----|------------------|------------------|
| <b>Men</b>      |    |                  |                  |
| Age 50-69 years |    |                  |                  |
| WHtR            |    | 0.537-0.559      | 0.560-0.761      |
| No. of cases    | 28 | 19               | 28               |
| Model 1         | 1  | 1.37 (0.76-2.46) | 2.34 (1.38-3.97) |
| Model 2         | 1  | 1.15 (0.63-2.09) | 1.78 (1.04-3.05) |
| Age ≥70 years   |    |                  |                  |
| WHtR            |    | 0.544-0.570      | 0.571-0.688      |
| No. of cases    | 21 | 16               | 14               |
| Model 1         | 1  | 1.71 (0.89-3.30) | 1.10 (0.56-2.18) |
| Model 2         | 1  | 1.63 (0.84-3.17) | 0.99 (0.50-1.95) |
| <b>Women</b>    |    |                  |                  |
| Age 50-69 years |    |                  |                  |
| WHtR            |    | 0.569-0.600      | 0.601-0.838      |
| No. of cases    | 16 | 18               | 15               |
| Model 1         | 1  | 1.97 (0.99-3.91) | 1.63 (0.80-3.34) |
| Model 2         | 1  | 1.66 (0.83-3.31) | 1.20 (0.57-2.52) |
| Age ≥70 years   |    |                  |                  |
| WHtR            |    | 0.603-0.646      | 0.647-0.812      |
| No. of cases    | 15 | 10               | 14               |
| Model 1         | 1  | 1.42 (0.63-3.18) | 2.33 (1.10-4.94) |
| Model 2         | 1  | 1.41 (0.63-3.16) | 2.16 (1.02-4.61) |

The highest (4th) quartile of WHtR was dichotomized by using the median WHtR in the fourth quartile (upper Q4 and lower Q4), and hazard ratios with 95% CIs for cardiovascular disease were estimated with the lowest (1st) quartile (Q1) as reference.

Model 1 adjusted for age, smoking, and drinking status. Model 2 adjusted for the variables in model 1 plus hypertension, diabetes, and hypercholesterolemia.

Parentheses indicate 95% CIs of hazard ratios.

Abbreviations: WHtR, waist-to-height ratio; Q, quartile.
