# Supplementary material for: Effect of Age on the Association Between Waist-to-Height Ratio and Incidence of Cardiovascular Disease: The Suita Study
Source: PubMed Central journal article supplement (PMC3775529; doi:10.2188/jea.je20130004), 2013-09-05
Supplement: je-23-351-s003.pdf [file je-23-351-s003.pdf]

**eTable 3. Multivariable-adjusted hazard ratios for cardiovascular disease according to sex, age group, and quartile of WHtR: the Suita Study, Japan**

|                        | Q1 (low) | Q2               | Q3               | Q4 (high)        | P for trend |
|------------------------|----------|------------------|------------------|------------------|-------------|
| Men aged 50-69 years   |          |                  |                  |                  |             |
| CVD                    | 1        | 1.06 (0.63-1.77) | 1.03 (0.61-1.73) | 1.46 (0.90-2.36) | 0.12        |
| CHD                    | 1        | 1.48 (0.67-3.28) | 1.35 (0.60-3.03) | 1.89 (0.89-4.03) | 0.13        |
| Stroke                 | 1        | 0.82 (0.41-1.64) | 0.83 (0.42-1.65) | 1.29 (0.68-2.42) | 0.41        |
| Ischemic stroke        | 1        | 0.86 (0.35-2.12) | 1.32 (0.58-3.01) | 1.59 (0.72-3.54) | 0.14        |
| Men aged ≥70 years     |          |                  |                  |                  |             |
| CVD                    | 1        | 1.34 (0.76-2.36) | 1.04 (0.59-1.84) | 1.25 (0.71-2.19) | 0.68        |
| CHD                    | 1        | 0.86 (0.38-1.95) | 0.61 (0.26-1.39) | 0.99 (0.47-2.11) | 0.82        |
| Stroke                 | 1        | 2.07 (0.90-4.79) | 1.71 (0.73-3.97) | 1.68 (0.71-3.99) | 0.42        |
| Ischemic stroke        | 1        | 2.84 (0.91-8.87) | 2.07 (0.65-6.64) | 2.41 (0.76-7.62) | 0.30        |
| Women aged 50-69 years |          |                  |                  |                  |             |
| CVD                    | 1        | 1.01 (0.51-1.99) | 1.15 (0.59-2.23) | 1.43 (0.76-2.68) | 0.21        |
| CHD                    | 1        | 0.41 (0.12-1.33) | 0.40 (0.12-1.31) | 0.94 (0.38-2.34) | 0.93        |
| Stroke                 | 1        | 1.78 (0.71-4.42) | 2.13 (0.87-5.18) | 2.06 (0.84-5.04) | 0.13        |
| Ischemic stroke        | 1        | 1.98 (0.51-7.73) | 2.48 (0.66-9.27) | 1.99 (0.53-7.56) | 0.37        |
| Women aged ≥70 years   |          |                  |                  |                  |             |
| CVD                    | 1        | 1.06 (0.51-2.21) | 0.92 (0.43-1.96) | 1.75 (0.91-3.39) | 0.12        |
| CHD                    | 1        | 1.24 (0.40-3.82) | 0.89 (0.26-3.03) | 1.60 (0.55-4.63) | 0.49        |
| Stroke                 | 1        | 0.89 (0.34-2.37) | 0.91 (0.35-2.39) | 1.90 (0.82-4.41) | 0.13        |
| Ischemic stroke        | 1        | 0.87 (0.22-3.37) | 0.77 (0.20-2.92) | 1.98 (0.65-6.03) | 0.23        |

Multivariable adjustments were performed for age, smoking, drinking status, diabetes, hypertension and hypercholesterolemia. Parentheses indicate 95% CIs of HRs.

Abbreviations: WHtR, waist-to-height ratio; Q, quartile; CVD, cardiovascular disease; CHD, coronary heart disease.
